# Supplementary figures and images for: Solidifying Fenofibrate Nanocrystal Suspension: A Scalable Approach via Granulation Method
Source: Hindawi journal article supplement (doi:10.1155/2023/1672030), 2023-12-26

Supplement-1:

Reconstituted solidified powders: P38-CT3

**
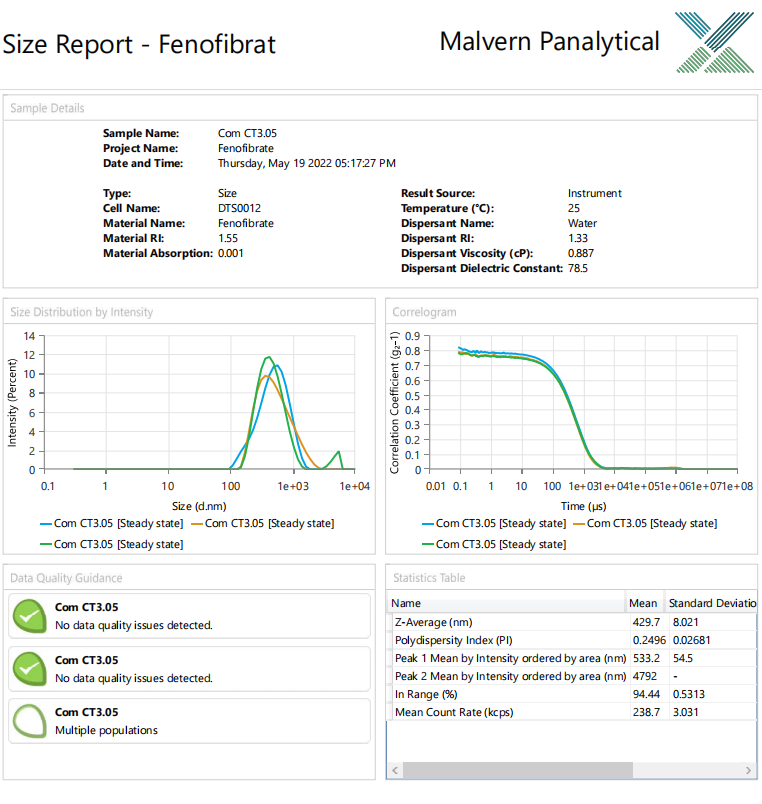
**

Supplement: f1 [file 1672030.f1.docx]
